# Supplementary material for: Sequence-dependent aggregation-prone conformations of islet amyloid polypeptide
Source: Royal Society of Chemistry journal article supplement (doi:10.1039/d1cp01061a), 2021-01-01
Supplement: d1cp01061a1.pdf [file d1cp01061a1.pdf]

**Supplementary Material for**

**Sequence-dependent aggregation-prone conformations of islet amyloid polypeptide**

Bumjoon Choi<sup>1,#</sup>, Nam Hyeong Kim<sup>2,#</sup>, Geun Young Jin<sup>3</sup>, Yung Sam Kim<sup>3</sup>, Yong Ho Kim<sup>2,4,5,\*</sup>, and Kilho Eom<sup>1,\*</sup>

<sup>1</sup>Biomechanics Lab, College of Sport Science, Sungkyunkwan University (SKKU), Suwon 16419, Republic of Korea

<sup>2</sup>SKKU Advanced Institute of Nano Technology (SAINT), Sungkyunkwan University (SKKU), Suwon 16419, Republic of Korea

<sup>3</sup>Department of Chemistry, Ulsan National Institute of Science and Technology (UNIST), 50 UNIST-gil, Ulsan 44919, Republic of Korea

<sup>4</sup>Department of Nano Engineering, Sungkyunkwan University (SKKU), Suwon 16419, Republic of Korea

<sup>5</sup>Center for Neuroscience Imaging Research, Institute for Basic Science (IBS), Suwon 16419, Republic of Korea

<sup>#</sup>Theses authors contributed equally to this work

\*Correspondence should be addressed to K.E. (E-mail: [kilhoeom@skku.edu](mailto:kilhoeom@skku.edu)), or Y.H.K. (E-mail: [yhkim94@skku.edu](mailto:yhkim94@skku.edu)).

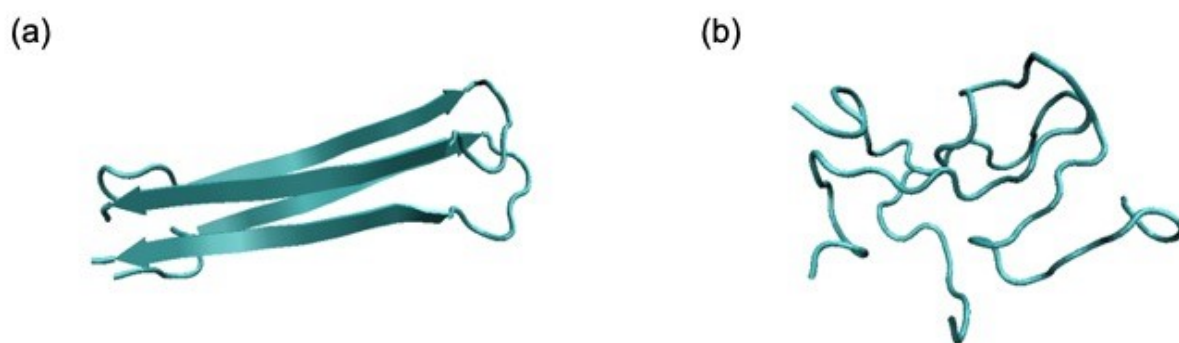

**Fig. S1.** (a) Dimeric structure extracted from the cross- $\beta$  structure of hIAPP fibril derived from solid-state NMR before a brute force MD simulation was performed. (b) Random coil-like dimeric structure, obtained from 50 ns brute-force MD simulation, was used as an initial structure for REMD simulation.

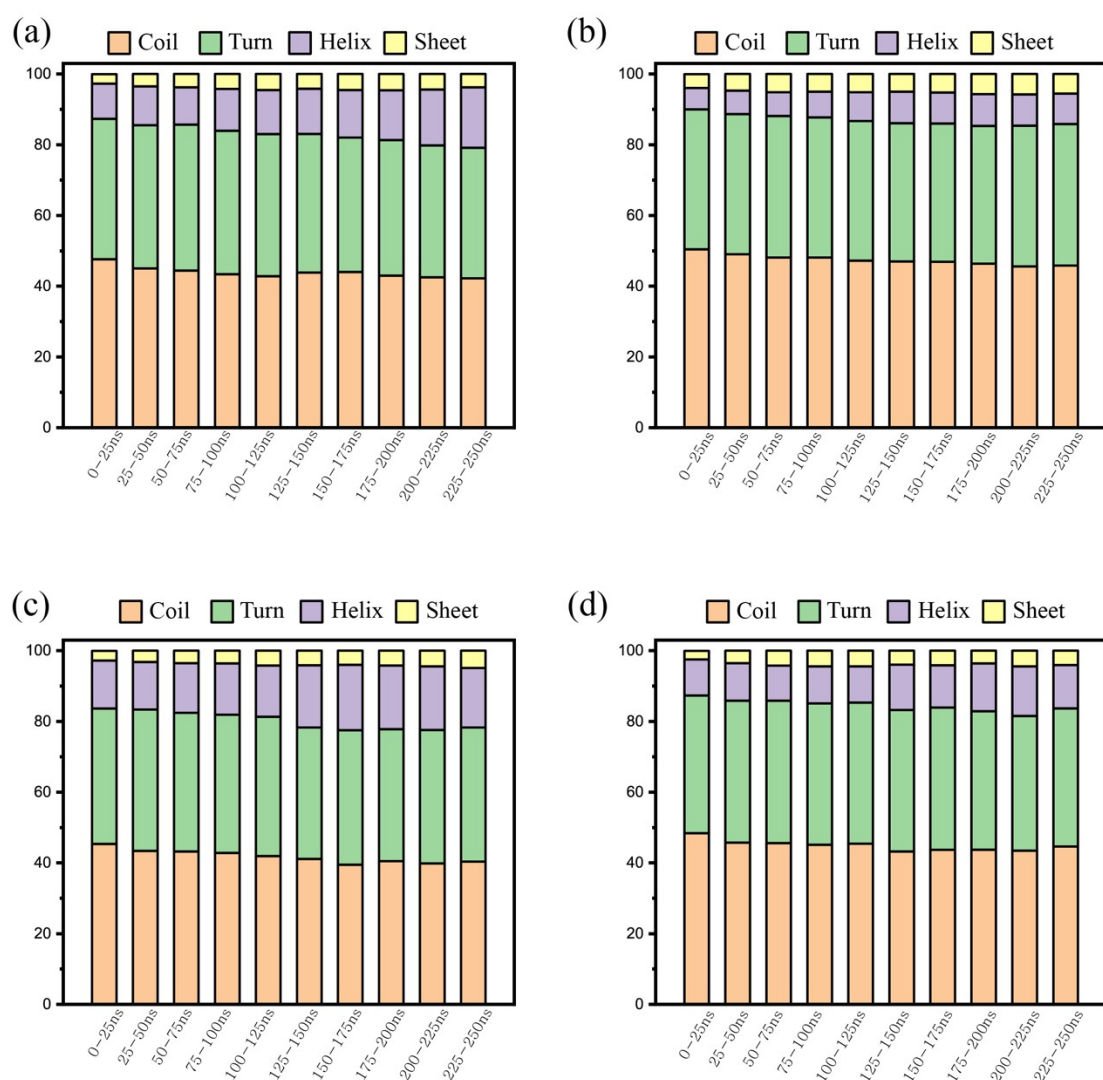

**Fig. S2.** Convergence tests based on block analysis for (a) hIAPP dimer, (b) rIAPP dimer, (c) hIAPP\_S20G dimer, and (d) hIAPP\_I26P dimer, respectively.

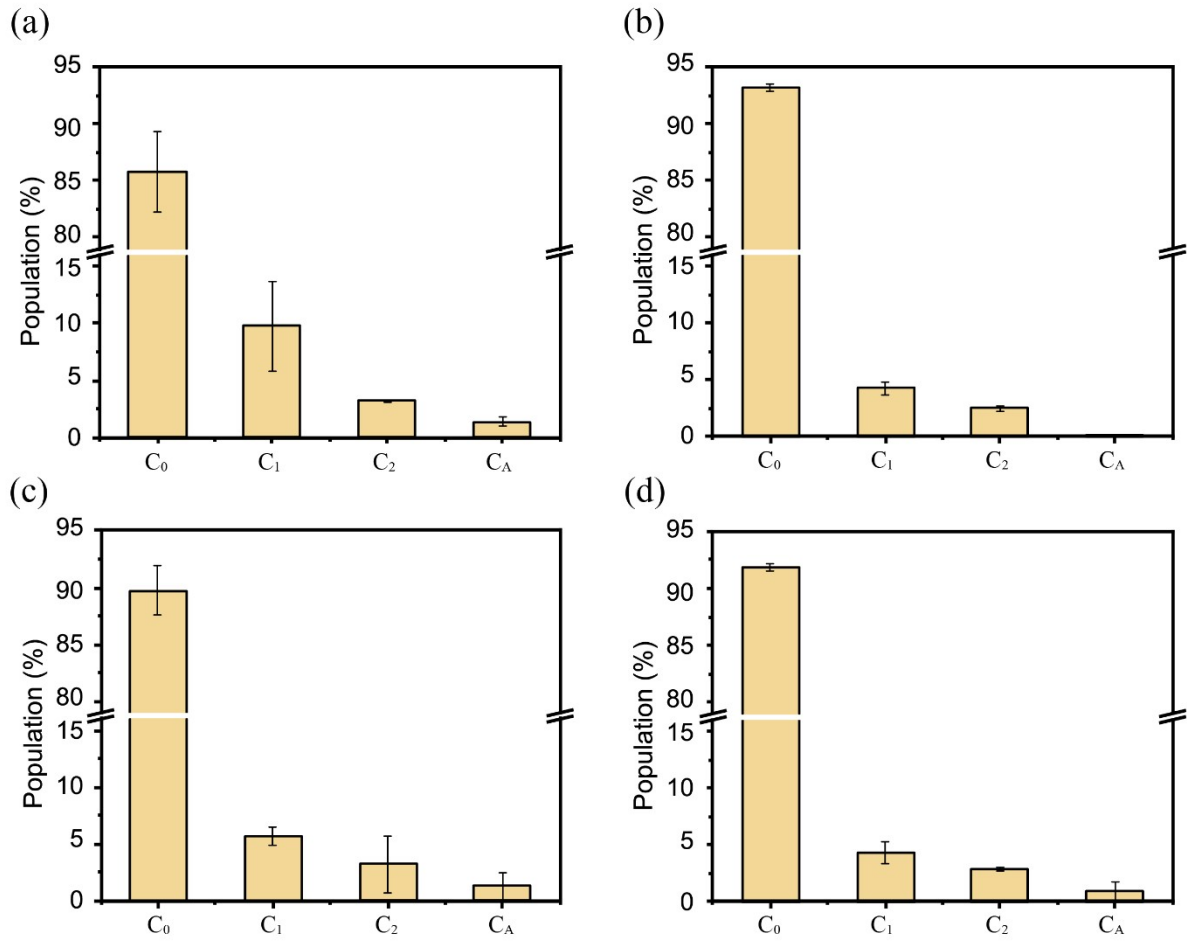

**Fig. S3.** Populations of aggregation-prone ( $C_A$ ),  $\beta_1$ -forming ( $C_1$ ),  $\beta_2$ -forming ( $C_2$ ), and non-aggregation-prone ( $C_0$ ) conformations for (a) hIAPP, (b) rIAPP, (c) hIAPP\_S20G, and (d) hIAPP\_I26P monomers. Here, error bar was calculated based on last 200ns trajectories that are divided into 2 blocks.

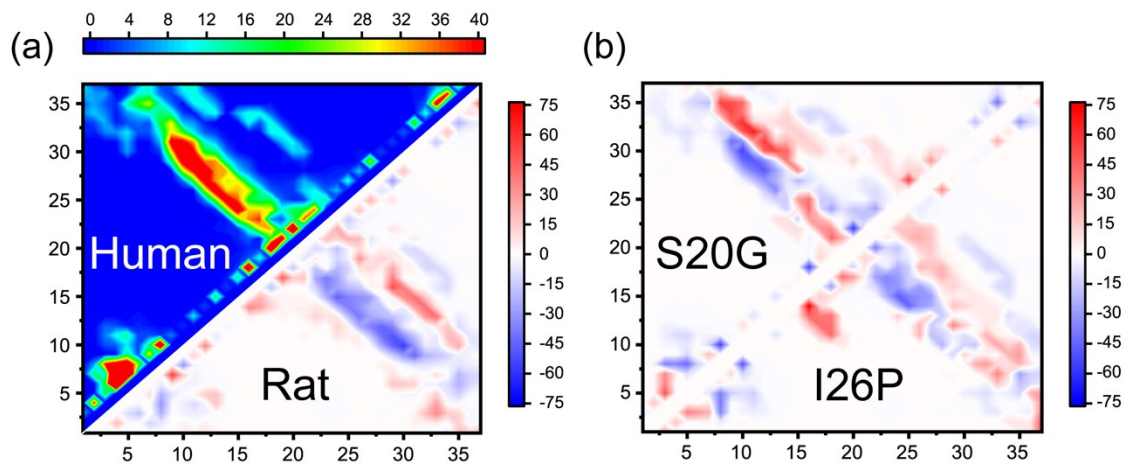

**Fig. S4.** (a) Contact map for aggregation-prone conformations ( $C_A$ ) for hIAPP monomer (left upper panel), and the change of a contact map for  $C_A$  structures of rIAPP monomer with respect to hIAPP monomer (right lower panel). (b) The change of contact map for  $C_A$  structures of hIAPP\_S20G monomer (left upper panel), or hIAPP\_I26P monomer (right lower panel), with respect to hIAPP monomer.

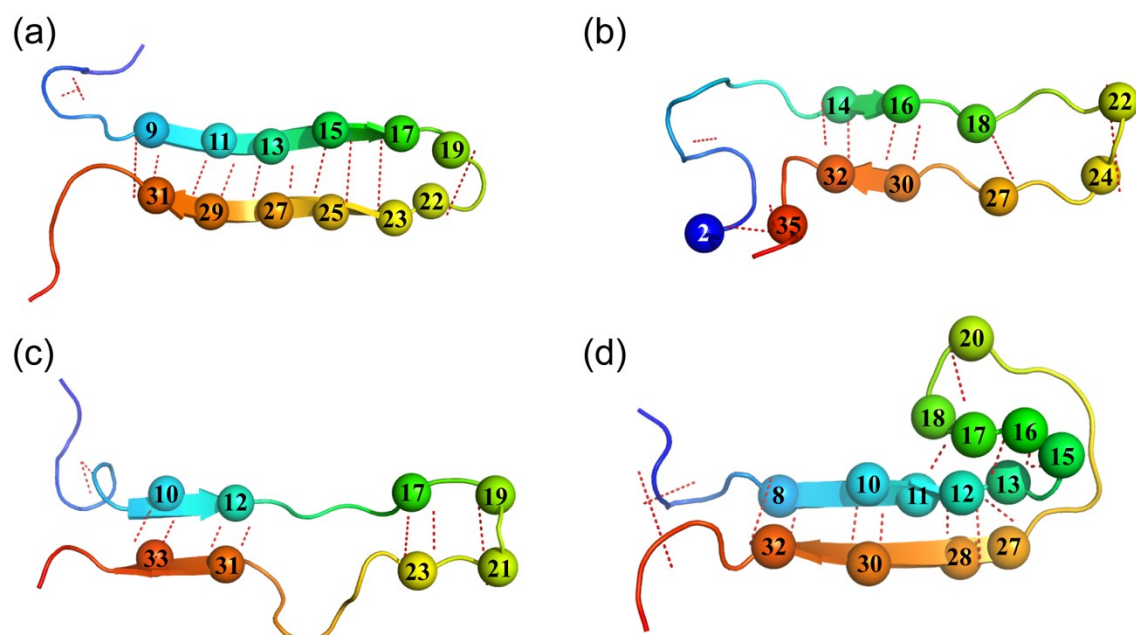

**Fig. S5.** Schematic representation of aggregation-prone conformations for (a) hIAPP monomer, (b) rIAPP monomer, (c) hIAPP\_S20G monomer, and (d) hIAPP\_I26P monomer, respectively. Here, red dashed lines between residues indicate the H-bonds.

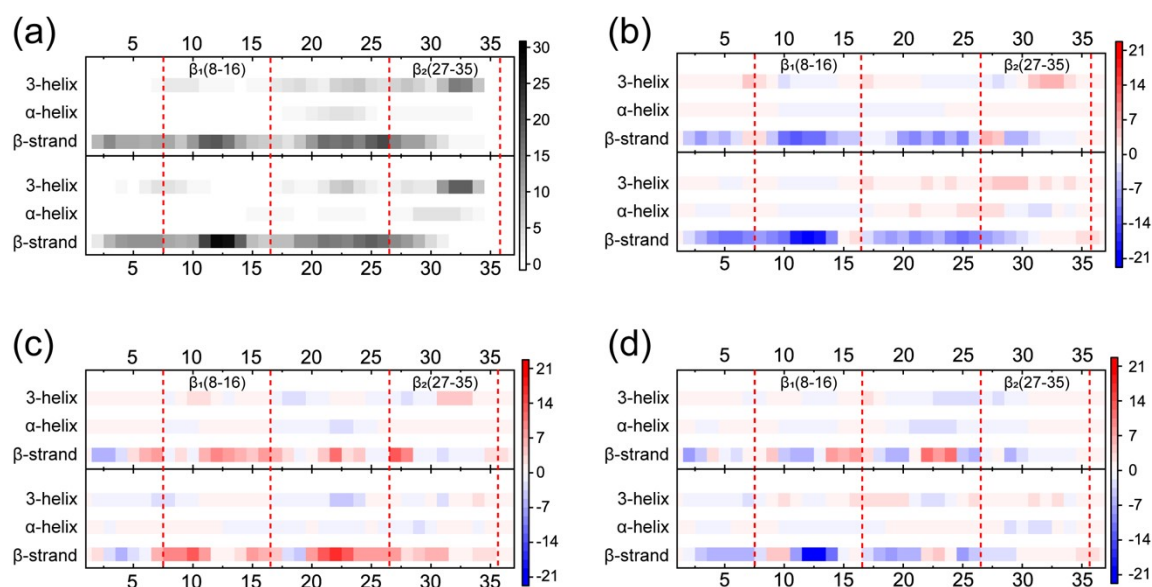

**Fig. S6.** Secondary structure analyses for four types of IAPP dimers. (a) Probabilities for each residue to form a secondary structure for hIAPP dimer. Changes of probabilities for each residue to construct a secondary structure for (b) rIAPP dimer, (c) hIAPP\_S20G dimer, or (d) hIAPP\_I26P dimer with respect to the probabilities for hIAPP dimer.

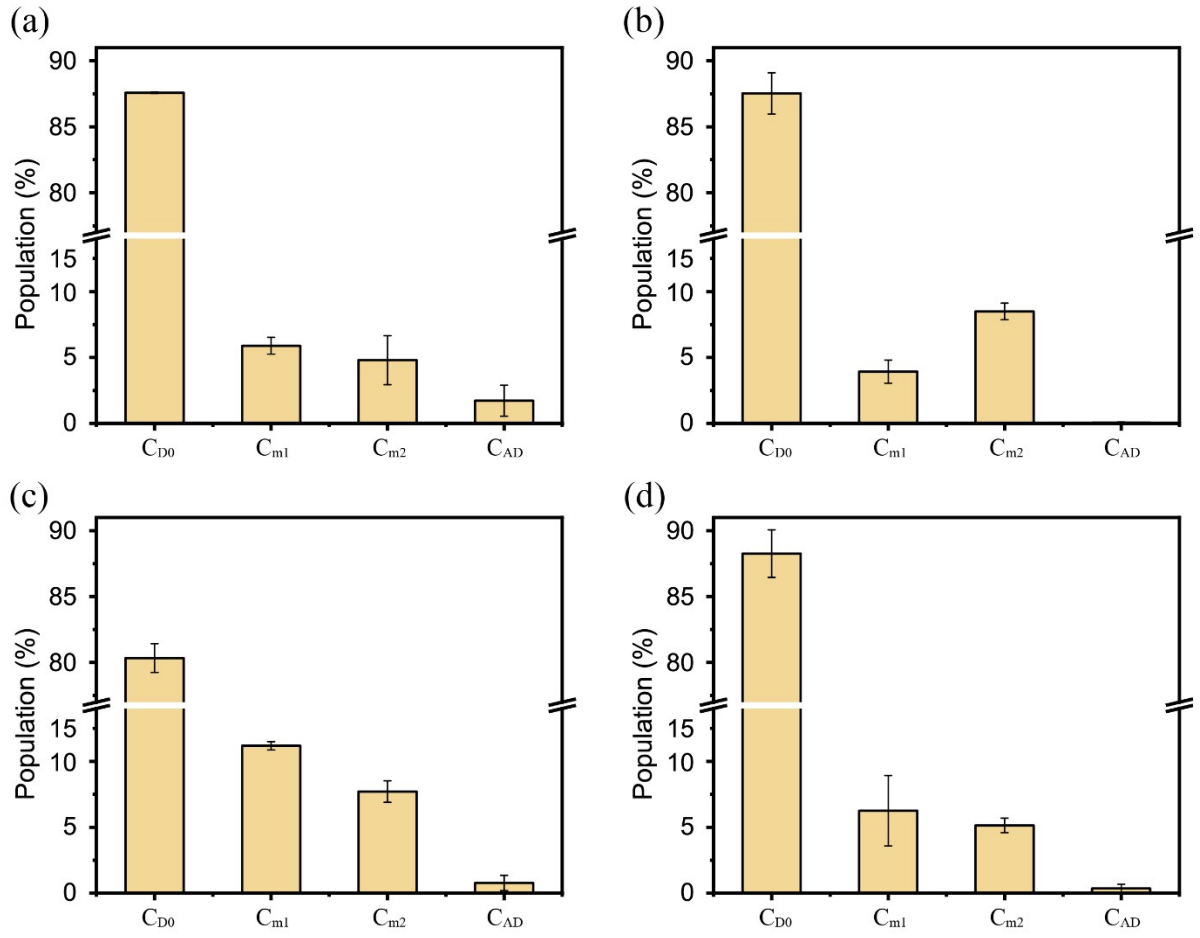

**Fig. S7.** Populations of aggregation-prone ( $C_A$ ), monomer 1-ordered ( $C_{m1}$ ), monomer 2-ordered ( $C_{m2}$ ), and non-aggregation-prone ( $C_{D0}$ ) conformations for (a) hIAPP dimer, (b) rIAPP dimer, (c) hIAPP\_S20G dimer, and (d) hIAPP\_I26P dimer. Here, the error bar was calculated based on last 200ns trajectories that are divided into 2 blocks.

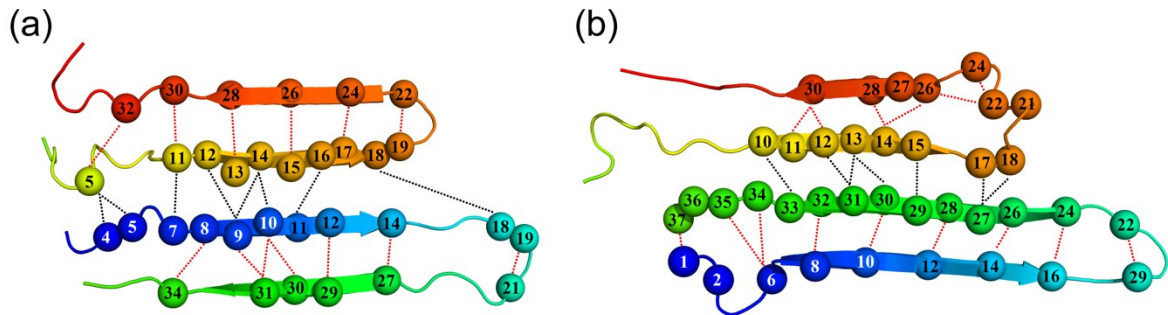

**Fig. S8.** Schematic representation of  $C_A$  structures for (a) hIAPP dimer, and (b) hIAPP\_S20G dimer.

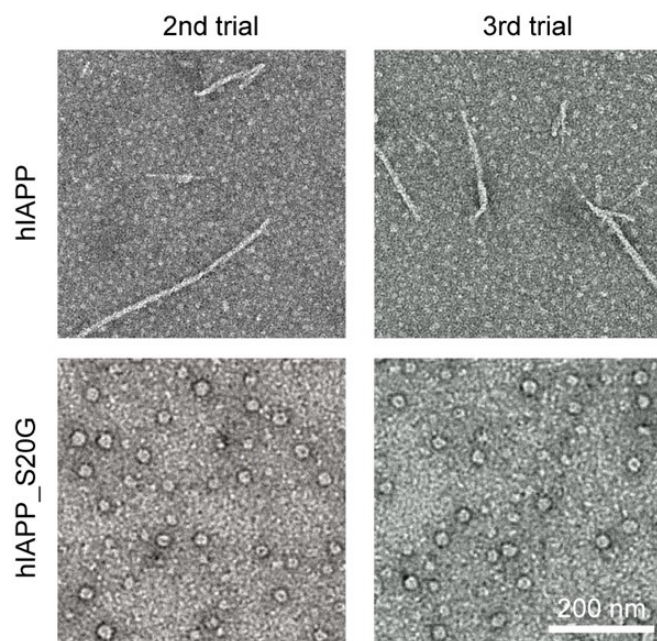

**Fig. S9.** TEM images of different samples for hIAPP and hIAPP\_S20G aggregates. These TEM images confirm the reproducibility of our experimental finding that hIAPP aggregation leads to the formation of amyloid fibril, while hIAPP\_S20G aggregation results in the barrel-like oligomer structures.

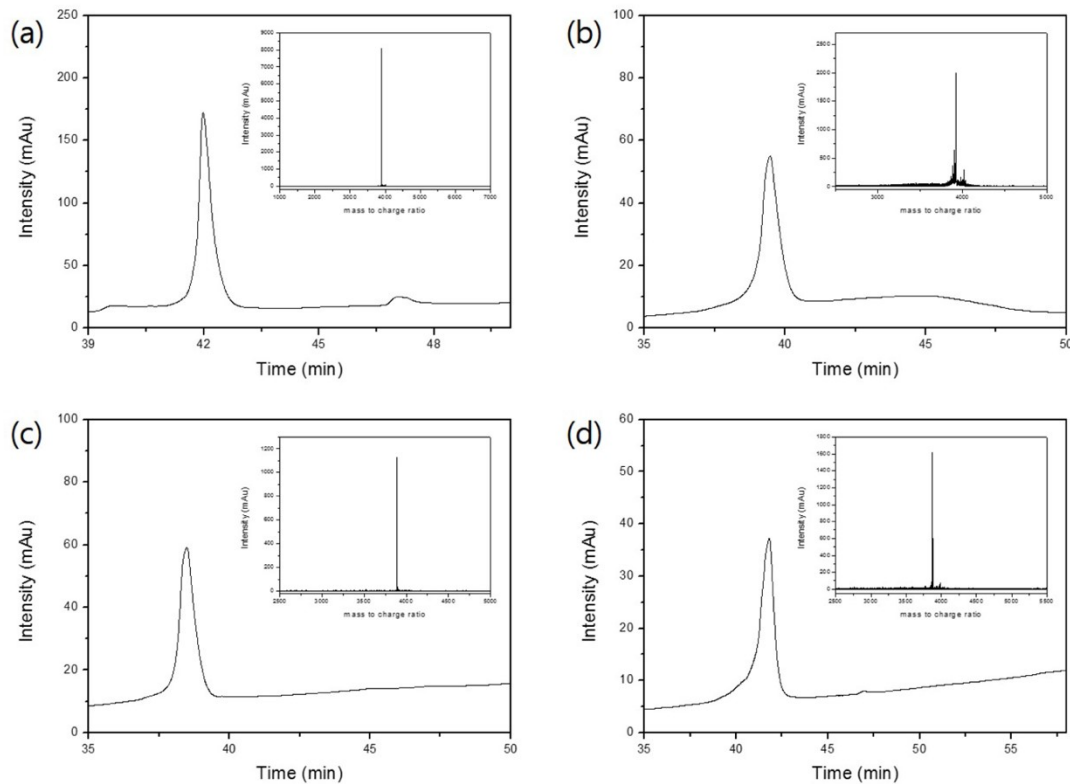

**Fig. S10.** Matrix assisted laser desorption/ionization-time of flight (MALDI-TOF) spectra for (a) hIAPP, (b) rIAPP, (c) hIAPP\_S20G, and (d) hIAPP\_I26P

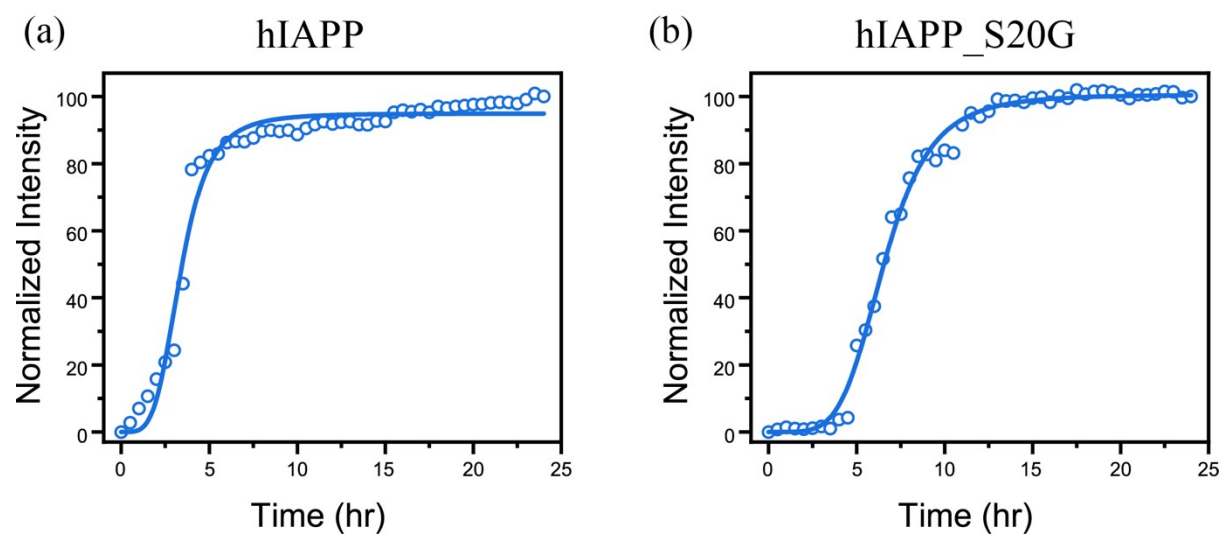

**Fig. S11.** ThT fluorescence spectra as a function of incubation time for (a) hIAPP aggregation, and (b) hIAPP\_S20G aggregation.
